# Supplementary material for: Incremental validity of acceptance over coping in predicting adjustment to endometriosis
Source: Frontiers journal article supplement (doi:10.3389/fpain.2022.928985), 2022-07-15
Supplement: Data_Sheet_1.PDF [file Data_Sheet_1.PDF]

## *Supplementary Material*

### **1 Supplementary Figures**

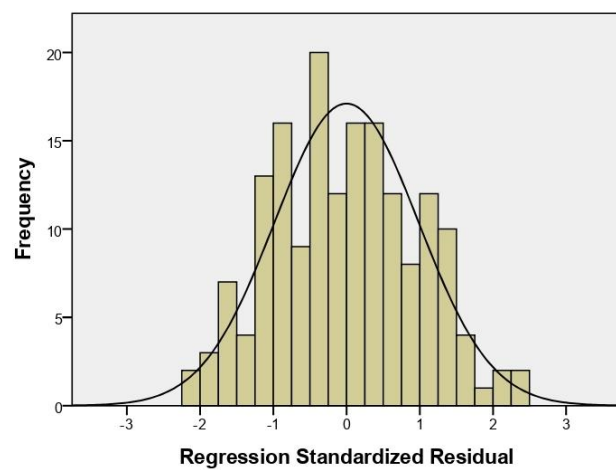

**Supplementary Figure 1.** Histogram of regression standardized residual for anxiety.

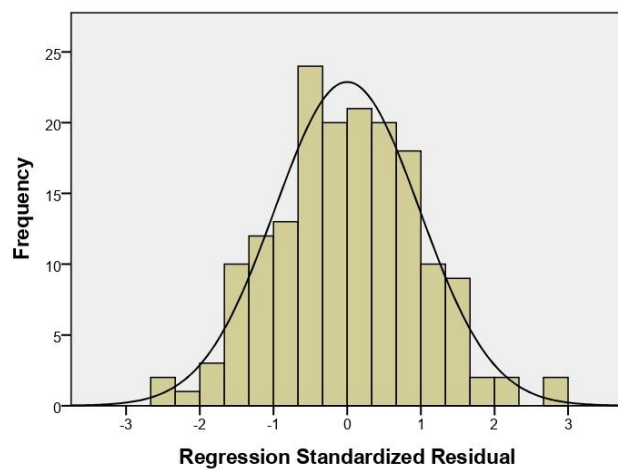

**Supplementary Figure 2.** Histogram of regression standardized residual for depression.

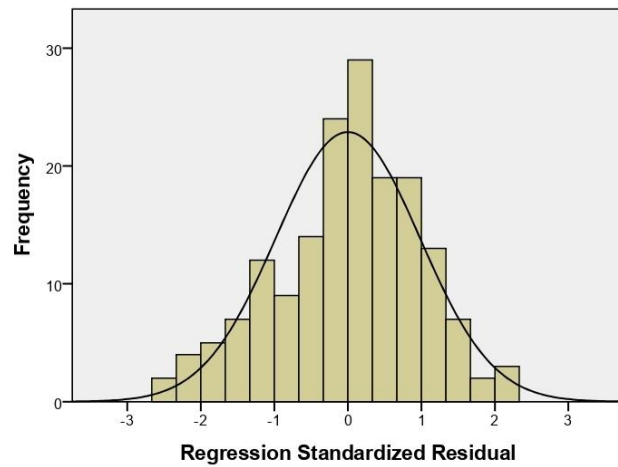

**Supplementary Figure 3.** Histogram of regression standardized residual for disability.

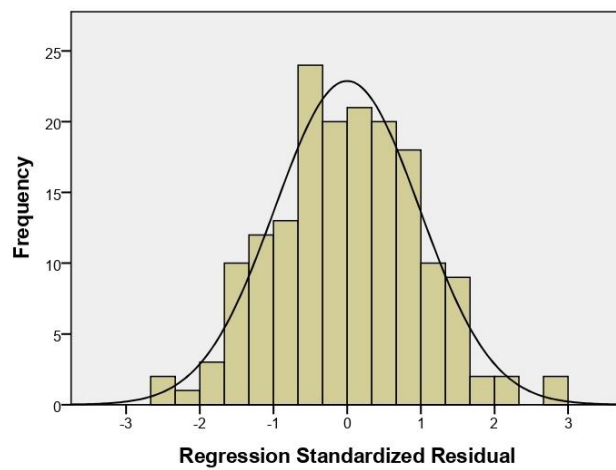

**Supplementary Figure 4.** Histogram of regression standardized residual for psychological well-being.

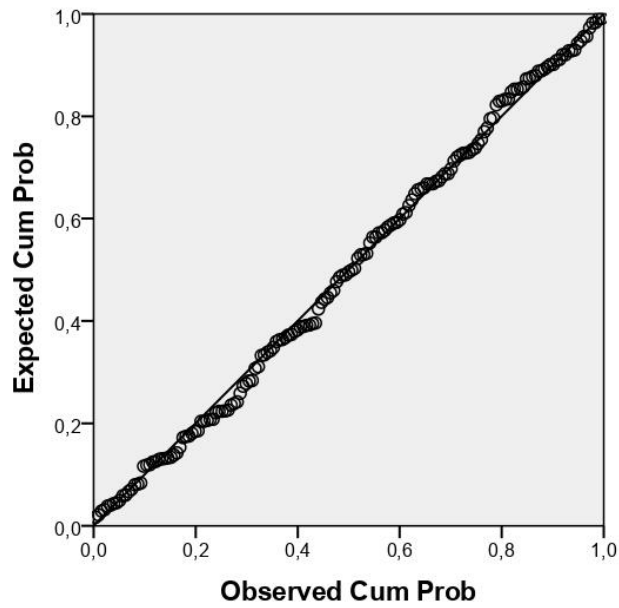

**Supplementary Figure 5.** Normal P-P plot of regression standardized residual for anxiety.

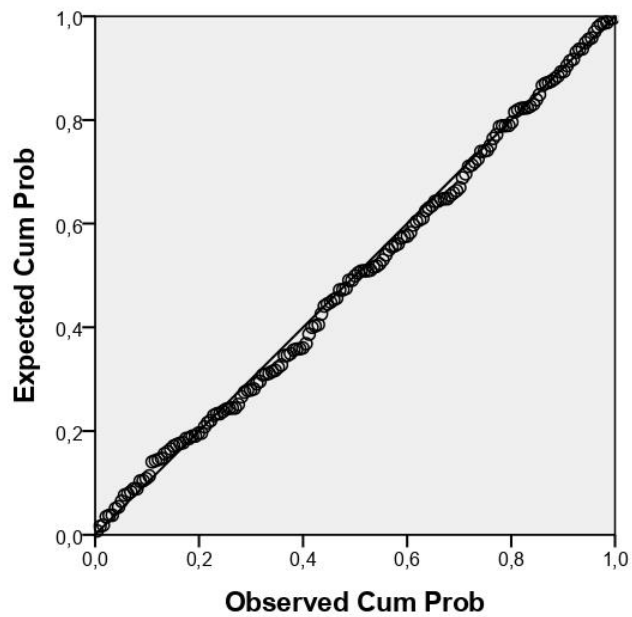

**Supplementary Figure 6.** Normal P-P plot of regression standardized residual for depression.

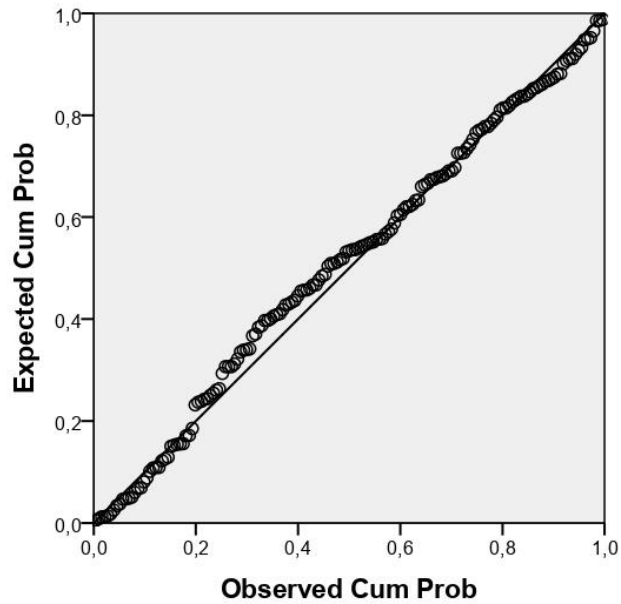

**Supplementary Figure 7.** Normal P-P plot of regression standardized residual for disability.

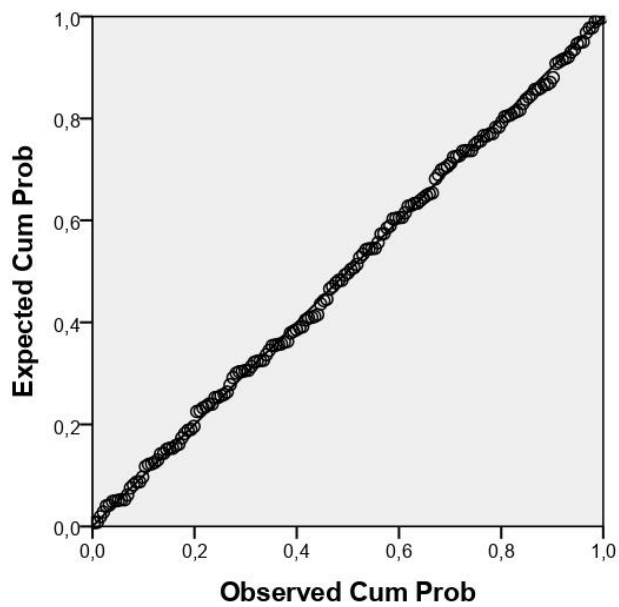

**Supplementary Figure 8.** Normal P-P plot of regression standardized residual for psychological well-being.

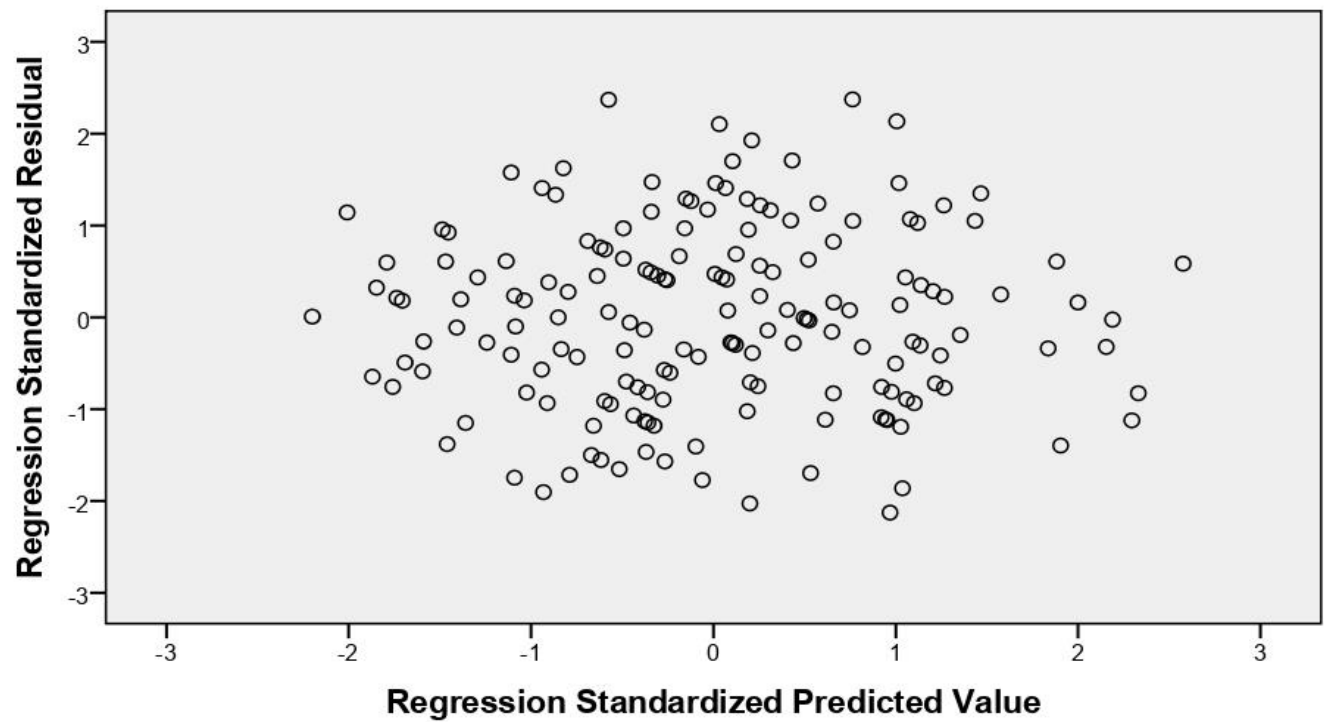

**Supplementary Figure 9.** Scatterplot of standardized residuals by standardized predicted values for anxiety.

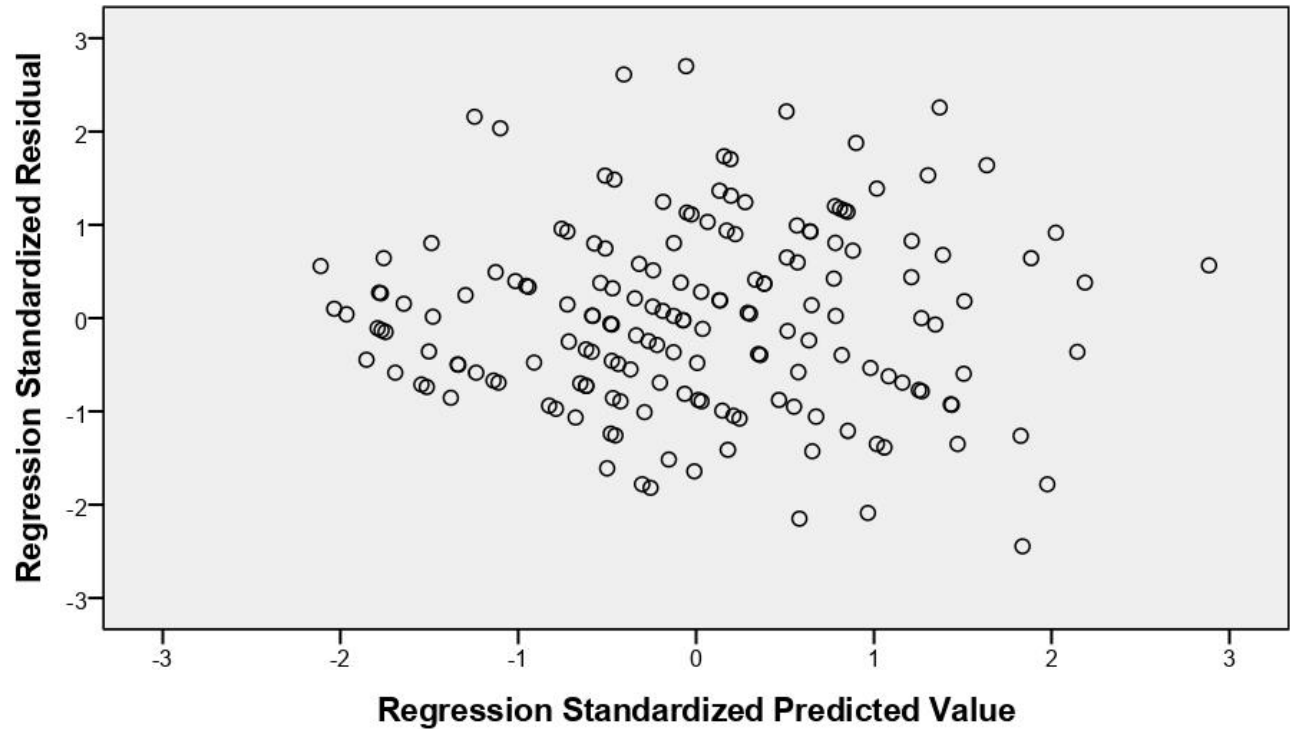

**Supplementary Figure 10.** Scatterplot of standardized residuals by standardized predicted values for depression.

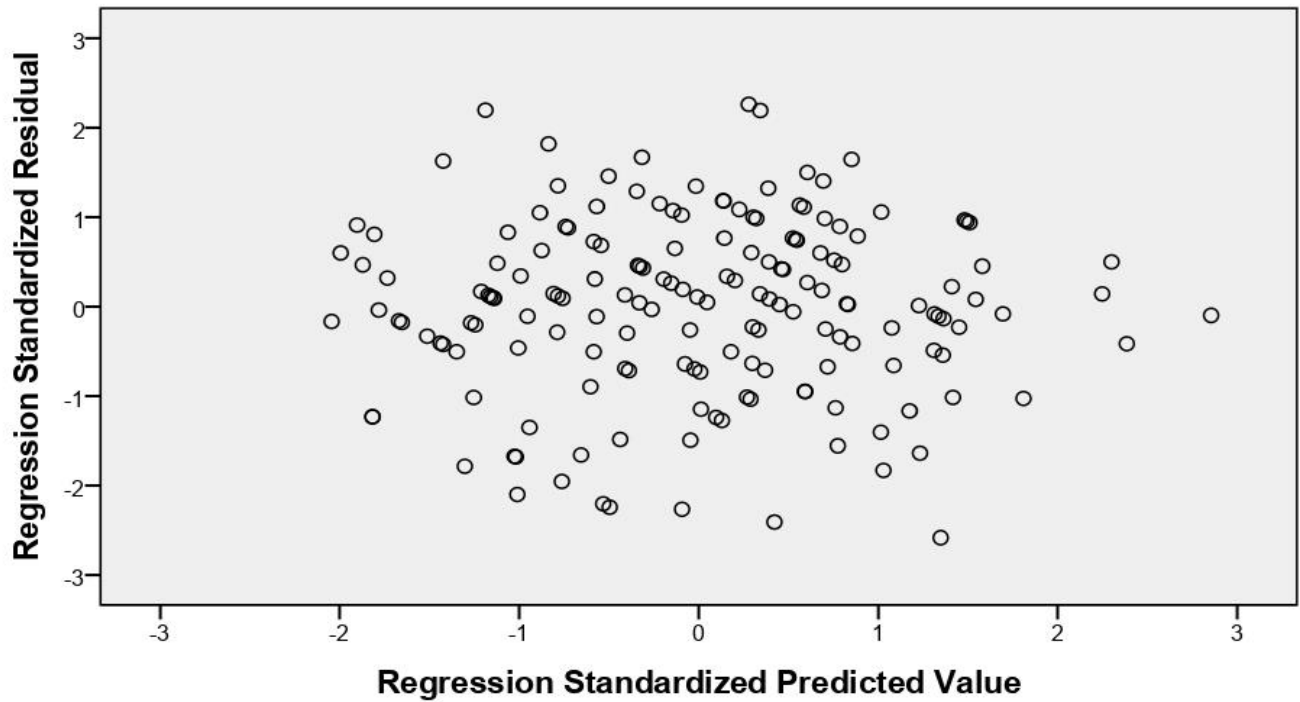

**Supplementary Figure 11.** Scatterplot of standardized residuals by standardized predicted values for disability.

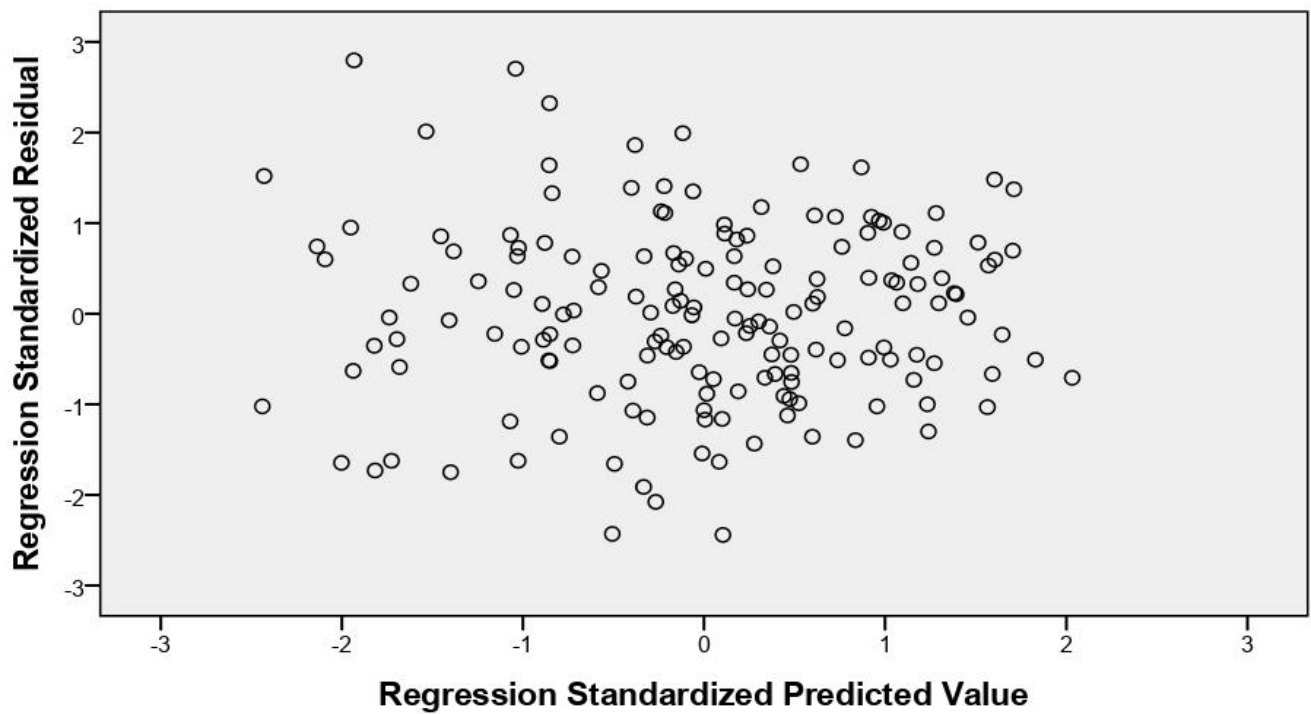

**Supplementary Figure 12.** Scatterplot of standardized residuals by standardized predicted values for psychological well-being.
